# Supplementary material for: Cold Physical Plasma Modulates p53 and Mitogen-Activated Protein Kinase Signaling in Keratinocytes
Source: Hindawi journal article supplement (doi:10.1155/2019/7017363), 2019-01-13
Supplement: f1 [file 7017363.f1.pdf]

## Suppl. Tables

**Table 1:** Primer sequences for down-stream targets of p53, which were used in quantitative RT-PCR analyses.

| gene          | sense primer           | antisense primer       |
|---------------|------------------------|------------------------|
| <b>BAX</b>    | TGCTTCAGGGTTTCATCCAG   | GGCGGCAATCATCCTCTG     |
| <b>BBC3</b>   | GACGACCTCAACGCACAGTA   | AGGAGTCCCATGATGAGATTGT |
| <b>GADD45</b> | CGCCTGTGAGTGAGTGC      | CTTATCCATCCTTTCGGTCTT  |
| <b>CDKN1A</b> | CCTCAAAGGCCCGCTCTACATC | GCCCAGCACTCTTAGGAACCTC |
| <b>GAPDH</b>  | ACCACAGTCCATGCCATCAC   | GGGCTCTCCAGAACATCA     |
